# Supplementary material for: Predicting Depression From Language-Based Emotion Dynamics: Longitudinal Analysis of Facebook and Twitter Status Updates
Source: PubMed Central journal article supplement (PMC5964306; doi:10.2196/jmir.9267), 2018-05-08
Supplement: jmir_v20i5e168_app1.pdf [file jmir_v20i5e168_app1.pdf]

## Multimedia Appendix 1

Emoji & internet slang additions to the *LIWC 2007* emotion dictionaries

| Positive Emoji's | Negative Emoji's |       | Positive Emotion Internet Slang |       |         | Negative Emotion Internet Slang |         |
|------------------|------------------|-------|---------------------------------|-------|---------|---------------------------------|---------|
| =D>              | :-l              | :-/   | Aight                           | j/j   | lyke    | Abft                            | fomo    |
| =D               | :l               | :/    | Aightz                          | jk    | marvy   | Acgaf                           | gank    |
| :D               | X(               | T_T   | Aiight                          | j/k   | njoy    | Aiic                            | grmbl   |
| :-D              | X-(              | T^T   | Aite                            | jks   | ql      | Arsed                           | h8      |
| (:)              | O                | QQ    | Alrt                            | j2f   | qool    | Awk                             | h80r    |
| (:-)             | b(               | =O::: | alryt                           | j4f   | qt      | Bm                              | h83r    |
| >:D<             | >:-(-            | ='(   | Alol                            | j4g   | qte     | Boom                            | h8ed    |
| :))              | >:-)             | &.(.. | Aml                             | j4l   | rofl*   | Bord                            | h8r     |
| :-X              | (:-&             | (;_)  | Aprece8                         | jfg   | *s*     | Bovered                         | h8red   |
| :X               | :@               | :'(   | Apreci8                         | jfl   | S'ok    | Catwot                          | h8s h8t |
| :)               | :(               | :'    | Awes                            | jfk   | Snog    | Cba                             | h8t0r   |
| :-)              | :-t              | :'-(  | Awsom                           | jja   | Sok     | Cbb                             | h8t3r   |
| ^^               | :-ll             | :'*(  | Awsome                          | jkz   | Sof     | Cbf                             | h8te    |
| ;)'              | :ll              | :'*-( | Bahaha                          | k     | Stm     | Cbfa                            | h8tr    |
| :-")             | :t               | :_(-  | Besos                           | kay   | Ub3r    | Cbfed                           | hait    |
| :")              | :-@              | :.[   | Bilu                            | kewel | W00t    | Cmeo                            | hey     |
| :)               | :{               | ;;    | Btwilu                          | kewl  | Woot    | Cmw                             | htr     |
| ;-)              | :-Z              | =\    | Btwitailwu                      | kk    | Xellent | Cof                             | id10d   |
| \o/              | :Z               | :l    | Byak                            | kl    | Xlnt    | Cotf                            | idjit   |
| ;-(-             | ??               | :(&   | Chillin                         | koo   | xtc     | Dc                              | idot    |
| :(               | @_@              | :-E   | Ctm                             | kool  |         | Dbm                             | idyat   |
| :')              | (-_*             | :-e   | Cut3                            | kss   |         | Dfc                             | invu    |
| :'-)             | (o_o)            | DX    | Eil                             | kssd  |         | Dgac                            | irhy    |
| >-)              | b(-              | /(    | Fab                             | kul   |         | Dgaf                            | isb     |
| :p               | %+l              | :-[   | Fah                             | kute  |         | Dgara                           | kmn     |
| :P               | :S               | :[    | Fi9                             | l0lz  |         | Dgas                            | kmp     |
| :-P              | :-S              | :-}   | Funee                           | laff  |         | Eejit                           | lsr     |
| :-p              | (:-              | :-}   | Funy                            | lal   |         | Eedyat                          | lzt     |
| :>               | :(               | #-)   | *g*                             | lol   |         | Ef                              | nv      |
| :->              | :-(-             | #)    | Gtm                             | lols  |         | Ef-ing                          | ofcol   |
| l_l              | l-o              | :-6   | Gud                             | lel   |         | Effed                           | oh noes |
| ^^               | \o               | :6    | Gudd                            | liek* |         | Effin                           | oh noez |
| ^?^              | :-o              | :-@   | Heh                             | lik   |         | Effing                          | p/oed   |
| ^^               | =((              | :(    | Hppy                            | lk    |         | F#cking                         | poed    |
| %)               | +-(              | :-<   | Hpy                             | lke   |         | F'n                             | ph33r   |
| %-)              | </3              | ><    | Haha                            | llc   |         | f-ing                           | phayl   |
| <3               | (U)              | ://   | I8                              | llf   |         | fml                             | phail   |
| <u3              | :-c              |       | Iatb                            | lmao  |         | f.m.l                           | r8p     |
|                  | :c               |       | Iight                           | lmfao |         | farg                            | r8pist  |
|                  | O.o              |       | Iigh                            | rofl  |         | fck                             | stupd   |
|                  | %)               |       | Ijdl                            | lml   |         | fcked                           | suk     |
|                  | %-)              |       | Ili                             | lov   |         | fckin                           | sukz    |
|                  | (@_@)            |       | Ilml                            | luv   |         | fcking                          | suxx    |
|                  | :s               |       | Ilms                            | luff  |         | feck                            | wrdo    |
|                  | :-Q              |       | Ilu*                            | luvv  |         | fk                              | wtf     |
|                  | :Q               |       | Ilshipmp                        | lurve |         | fkd                             |         |
|                  | :-\$             |       | Irly                            | lv    |         | fker                            |         |
|                  | :\$              |       | Ite                             | lve   |         | fkin                            |         |
|                  |                  |       | Jj                              | lyk   |         | fking                           |         |
